# Supplementary material for: Maintaining the Resilience and Productivity of Co-culture Systems in the Face of Environmental Change
Source: Research Square preprint supplement (doi:10.21203/rs.3.rs-856052/v1), 2021-09-21
Supplement: Supplementary file 1 [file 202321476cf6325ab9784ead.xlsx]

## Sheet: Summary
PNS	Summary of ecosystem structures that were generated by P-graph
	Solution structures	Raw materials				Products			Operating units																										Cost
		available_RM10	available_RM11	available_RM12	RM_DET	P01	P11	RR	_01_01	_01_PClarkii	_02_01	_02_Snail	_03_01	_03_AWorm	_04_01	_04_CLarvae	_05_01	_05_Copepoda	_06_01	_06_Cladocera	_07_01	_07_Rotifera	_08_BBacteria	_09_Bacterioplankton	_10_01	_10_APlants	_11_01	_11_Rice	_12_01	_12_PPlankton	_13_1	_13_Detritus	External_Detritus	Ratios
		[u/y]	[u/y]	[u/y]	[u/y]	[u/y]	[u/y]	[u/y]																											[EUR/y]
	Structure1	-3.914	-10.3	-0.04017		1.23963	7.72	10.3		8.26417															3.914	3.914	2.58	10.3	0.04017	0.04017	1.73	1.73		10.3	-1.23963
	Structure2	-3.914	-10.3	-0.04017		1.234	7.72	10.3		8.22665											0.0216842	0.0542105	0.00361404	0.00501447	3.914	3.914	2.58	10.3		0.04017	1.71096	1.73		10.3	-1.234
	Structure3	-3.914	-10.3	-0.04017		1.23372	7.72	10.3		8.22478									0.0171635	0.0429089		0.0158763	0.00248871	0.00457945	3.914	3.914	2.58	10.3		0.04017	1.71362	1.73		10.3	-1.23372
	Structure4	-3.914	-10.3	-0.04017		1.2336	7.72	10.3		8.224															3.914	3.914	2.58	10.3		0.04017	1.73	1.73		10.3	-1.2336
	Structure5	-3.914	-10.3	-0.04017		0.998202	7.72	10.3		6.65468					0.16068	0.8034							0.96677		3.914	3.914	2.58	10.3		0.04017		1.73		10.3	-0.998202
	Structure6	-3.914	-10.3	-0.04017		0.998202	7.72	10.3		6.65468					0.16068	0.8034								0.96677	3.914	3.914	2.58	10.3		0.04017		1.73		10.3	-0.998202
	Structure7	-3.914	-10.3	-0.04017		0.992116	7.72	10.3		6.61411			0.12051	0.4017									1.36887		3.9136	3.914	2.58	10.3		0.04017		1.73		10.3	-0.992116
	Structure8	-3.914	-10.3	-0.04017		0.992116	7.72	10.3		6.61411			0.12051	0.4017										1.36887	3.9136	3.914	2.58	10.3		0.04017		1.73		10.3	-0.992116
	Structure9	-3.914	-10.3	-0.04017		0.985797	7.72	10.3		6.57198	0.0787647	0.787647											0.970314	0.0216603	3.91321	3.914	2.58	10.3		0.04017		1.73		10.3	-0.985797
	Structure10	-3.914	-10.3	-0.04017		0.985797	7.72	10.3		6.57198	0.0787647	0.787647												0.991975	3.91321	3.914	2.58	10.3		0.04017		1.73		10.3	-0.985797
	Structure11	-3.914	-10.3	-0.04017		0.980125	7.72	10.3		6.53417															3.914	3.914	2.58	10.3	0.04017	0.04017				10.3	-0.980125
	Structure12	-3.914	-10.3	-0.04017		0.977353	7.72	10.3		6.51568											0.0216842	0.0542105	1.71458	0.00501447	3.914	3.914	2.58	10.3		0.04017		1.73		10.3	-0.977353
	Structure13	-3.914	-10.3	-0.04017		0.976675	7.72	10.3		6.51116									0.0171635	0.0429089		0.0158763	1.71611	0.00457945	3.914	3.914	2.58	10.3		0.04017		1.73		10.3	-0.976675
	Structure14	-3.914	-10.3	-0.04017		0.975524	7.72	10.3		6.5035							0.00949666	0.0237417		0.0273029		0.0200142	1.71718	0.00383078	3.914	3.914	2.58	10.3		0.04017		1.73		10.3	-0.975524
	Structure15	-3.914	-10.3	-0.04017		0.9741	7.72	10.3		6.494															3.914	3.914	2.58	10.3		0.04017				10.3	-0.9741
	Structure16	-3.914	-10.3	-0.04017		0.852626	10.3	10.3		5.68417															3.914	3.914		10.3	0.04017	0.04017	1.73	1.73		10.3	-0.852626
	Structure17	-3.914	-10.3	-0.04017		0.846997	10.3	10.3		5.64665											0.0216842	0.0542105	0.00361404	0.00501447	3.914	3.914		10.3		0.04017	1.71096	1.73		10.3	-0.846997
	Structure18	-3.914	-10.3	-0.04017		0.846717	10.3	10.3		5.64478									0.0171635	0.0429089		0.0158763	0.00248871	0.00457945	3.914	3.914		10.3		0.04017	1.71362	1.73		10.3	-0.846717
	Structure19	-3.914	-10.3	-0.04017		0.8466	10.3	10.3		5.644															3.914	3.914		10.3		0.04017	1.73	1.73		10.3	-0.8466
	Structure20	-3.914	-10.3	-0.04017		0.652526	7.72	10.3		4.35017																3.914	2.58	10.3	0.04017	0.04017	1.73	1.73		10.3	-0.652526
	Structure21	-3.914	-10.3	-0.04017		0.646897	7.72	10.3		4.31265											0.0216842	0.0542105	0.00361404	0.00501447		3.914	2.58	10.3		0.04017	1.71096	1.73		10.3	-0.646897
	Structure22	-3.914	-10.3	-0.04017		0.646617	7.72	10.3		4.31078									0.0171635	0.0429089		0.0158763	0.00248871	0.00457945		3.914	2.58	10.3		0.04017	1.71362	1.73		10.3	-0.646617
	Structure23	-3.914	-10.3	-0.04017		0.6465	7.72	10.3		4.31																3.914	2.58	10.3		0.04017	1.73	1.73		10.3	-0.6465
	Structure24	-3.914	-10.3	-0.04017		0.611202	10.3	10.3		4.07468					0.16068	0.8034							0.96677		3.914	3.914		10.3		0.04017		1.73		10.3	-0.611202
	Structure25	-3.914	-10.3	-0.04017		0.611202	10.3	10.3		4.07468					0.16068	0.8034								0.96677	3.914	3.914		10.3		0.04017		1.73		10.3	-0.611202
	Structure26	-3.914	-10.3	-0.04017		0.605116	10.3	10.3		4.03411			0.12051	0.4017									1.36887		3.9136	3.914		10.3		0.04017		1.73		10.3	-0.605116
	Structure27	-3.914	-10.3	-0.04017		0.605116	10.3	10.3		4.03411			0.12051	0.4017										1.36887	3.9136	3.914		10.3		0.04017		1.73		10.3	-0.605116
	Structure28	-3.914	-10.3	-0.04017		0.598797	10.3	10.3		3.99198	0.0787647	0.787647											0.970314	0.0216603	3.91321	3.914		10.3		0.04017		1.73		10.3	-0.598797
	Structure29	-3.914	-10.3	-0.04017		0.598797	10.3	10.3		3.99198	0.0787647	0.787647												0.991975	3.91321	3.914		10.3		0.04017		1.73		10.3	-0.598797
	Structure30	-3.914	-10.3	-0.04017		0.593125	10.3	10.3		3.95417															3.914	3.914		10.3	0.04017	0.04017				10.3	-0.593125
	Structure31	-3.914	-10.3	-0.04017		0.590353	10.3	10.3		3.93568											0.0216842	0.0542105	1.71458	0.00501447	3.914	3.914		10.3		0.04017		1.73		10.3	-0.590353
	Structure32	-3.914	-10.3	-0.04017		0.589675	10.3	10.3		3.93116									0.0171635	0.0429089		0.0158763	1.71611	0.00457945	3.914	3.914		10.3		0.04017		1.73		10.3	-0.589675
	Structure33	-3.914	-10.3	-0.04017		0.588524	10.3	10.3		3.9235							0.00949666	0.0237417		0.0273029		0.0200142	1.71718	0.00383078	3.914	3.914		10.3		0.04017		1.73		10.3	-0.588524
	Structure34	-3.914	-10.3	-0.04017		0.5871	10.3	10.3		3.914															3.914	3.914		10.3		0.04017				10.3	-0.5871
	Structure35	-3.914	-10.3	-0.04017		0.411102	7.72	10.3		2.74068					0.16068	0.8034							0.96677			3.914	2.58	10.3		0.04017		1.73		10.3	-0.411102
	Structure36	-3.914	-10.3	-0.04017		0.411102	7.72	10.3		2.74068					0.16068	0.8034								0.96677		3.914	2.58	10.3		0.04017		1.73		10.3	-0.411102
	Structure37	-3.914	-10.3	-0.04017		0.405077	7.72	10.3		2.70051			0.12051	0.4017									1.36887			3.914	2.58	10.3		0.04017		1.73		10.3	-0.405077
	Structure38	-3.914	-10.3	-0.04017		0.405077	7.72	10.3		2.70051			0.12051	0.4017										1.36887		3.914	2.58	10.3		0.04017		1.73		10.3	-0.405077
	Structure39	-3.914	-10.3	-0.04017		0.398815	7.72	10.3		2.65876	0.0787647	0.787647											0.970314	0.0216603		3.914	2.58	10.3		0.04017		1.73		10.3	-0.398815
	Structure40	-3.914	-10.3	-0.04017		0.398815	7.72	10.3		2.65876	0.0787647	0.787647												0.991975		3.914	2.58	10.3		0.04017		1.73		10.3	-0.398815
	Structure41	-3.914	-10.3	-0.04017		0.393026	7.72	10.3		2.62017																3.914	2.58	10.3	0.04017	0.04017				10.3	-0.393026
	Structure42	-3.914	-10.3	-0.04017		0.390253	7.72	10.3		2.60168											0.0216842	0.0542105	1.71458	0.00501447		3.914	2.58	10.3		0.04017		1.73		10.3	-0.390253
	Structure43	-3.914	-10.3	-0.04017		0.389575	7.72	10.3		2.59716									0.0171635	0.0429089		0.0158763	1.71611	0.00457945		3.914	2.58	10.3		0.04017		1.73		10.3	-0.389575
	Structure44	-3.914	-10.3	-0.04017		0.388424	7.72	10.3		2.5895							0.00949666	0.0237417		0.0273029		0.0200142	1.71718	0.00383078		3.914	2.58	10.3		0.04017		1.73		10.3	-0.388424
	Structure45	-3.914	-10.3	-0.04017		0.387	7.72	10.3		2.58																3.914	2.58	10.3		0.04017				10.3	-0.387
	Structure46	-3.914	-10.3	-0.04017	-0.490881	0.265525	10.3	10.3		1.77017																3.914		10.3	0.04017	0.04017	1.73	1.73	0.490881	10.3	-0.265525
	Structure47	-3.914	-10.3	-0.04017	-0.493737	0.259897	10.3	10.3		1.73265											0.0216842	0.0542105	0.00361404	0.00501447		3.914		10.3		0.04017	1.71096	1.73	0.493737	10.3	-0.259897
	Structure48	-3.914	-10.3	-0.04017	-0.493525	0.259617	10.3	10.3		1.73078									0.0171635	0.0429089		0.0158763	0.00248871	0.00457945		3.914		10.3		0.04017	1.71362	1.73	0.493525	10.3	-0.259617
	Structure49	-3.914	-10.3	-0.04017	-0.519	0.2595	10.3	10.3		1.73																3.914		10.3		0.04017	1.73	1.73	0.519	10.3	-0.2595
	Structure50	-3.914	-10.3	-0.04017	-1.18315	0.024102	10.3	10.3		0.16068					0.16068	0.8034							0.96677			3.914		10.3		0.04017		1.73	1.18315	10.3	-0.024102
	Structure51	-3.914	-10.3	-0.04017	-1.18315	0.024102	10.3	10.3		0.16068					0.16068	0.8034								0.96677		3.914		10.3		0.04017		1.73	1.18315	10.3	-0.024102
	Structure52	-3.914	-10.3	-0.04017	-1.25136	0.0180765	10.3	10.3		0.12051			0.12051	0.4017									1.36887			3.914		10.3		0.04017		1.73	1.25136	10.3	-0.0180765
	Structure53	-3.914	-10.3	-0.04017	-1.25136	0.0180765	10.3	10.3		0.12051			0.12051	0.4017										1.36887		3.914		10.3		0.04017		1.73	1.25136	10.3	-0.0180765
	Structure54	-3.914	-10.3	-0.04017	-1.31894	0.0118147	10.3	10.3		0.0787647	0.0787647	0.787647												0.991975		3.914		10.3		0.04017		1.73	1.31894	10.3	-0.0118147
	Structure55	-3.914	-10.3	-0.04017	-1.31894	0.0118147	10.3	10.3		0.0787647	0.0787647	0.787647											0.970314	0.0216603		3.914		10.3		0.04017		1.73	1.31894	10.3	-0.0118147
	Structure56	-3.914	-10.3	-0.04017		0.0060255	10.3	10.3		0.04017																3.914		10.3	0.04017	0.04017				10.3	-0.0060255
	Structure57	-3.914	-10.3	-0.04017	-1.34922	0.00325263	10.3	10.3		0.0216842											0.0216842	0.0542105	1.71458	0.00501447		3.914		10.3		0.04017		1.73	1.34922	10.3	-0.00325263
	Structure58	-3.914	-10.3	-0.04017	-1.35033	0.00257453	10.3	10.3		0.0171635									0.0171635	0.0429089		0.0158763	1.71611	0.00457945		3.914		10.3		0.04017		1.73	1.35033	10.3	-0.00257453
	Structure59	-3.914	-10.3	-0.04017	-1.35073	0.0014245	10.3	10.3		0.00949666							0.00949666	0.0237417		0.0273029		0.0200142	1.71718	0.00383078		3.914		10.3		0.04017		1.73	1.35073	10.3	-0.0014245
	Structure60	-3.914	-10.3	-0.04017			10.3	10.3																		3.914		10.3		0.04017				10.3	0

## Sheet: per kg of rice
PNS	Productivity is expressed in 10-2 kg of species/kg of rice
	Solution structures	Raw materials				Products			Operating units																										Cost
		available_RM10	available_RM11	available_RM12	RM_DET	P01	P11	RR	_01_01	_01_PClarkii	_02_01	_02_Snail	_03_01	_03_AWorm	_04_01	_04_CLarvae	_05_01	_05_Copepoda	_06_01	_06_Cladocera	_07_01	_07_Rotifera	_08_BBacteria	_09_Bacterioplankton	_10_01	_10_APlants	_11_01	_11_Rice	_12_01	_12_PPlankton	_13_1	_13_Detritus	External_Detritus	Ratios
		[u/y]	[u/y]	[u/y]	[u/y]	[u/y]	[u/y]	[u/y]																											[EUR/y]
	Structure1	-38	-100	-0.39		12.0352	74.9515	100		80.2347															38	38	25.0485	100	0.39	0.39	16.7961	16.7961		100	-12.0352
	Structure2	-38	-100	-0.39		11.9806	74.9515	100		79.8704											0.210526	0.526316	0.0350878	0.0486842	38	38	25.0485	100		0.39	16.6113	16.7961		100	-11.9806
	Structure3	-38	-100	-0.39		11.9779	74.9515	100		79.8522									0.166636	0.416591		0.154139	0.0241622	0.0444607	38	38	25.0485	100		0.39	16.6371	16.7961		100	-11.9779
	Structure4	-38	-100	-0.39		11.9767	74.9515	100		79.8447															38	38	25.0485	100		0.39	16.7961	16.7961		100	-11.9767
	Structure5	-38	-100	-0.39		9.69128	74.9515	100		64.6085					1.56	7.8							9.38612		38	38	25.0485	100		0.39		16.7961		100	-9.69128
	Structure6	-38	-100	-0.39		9.69128	74.9515	100		64.6085					1.56	7.8								9.38612	38	38	25.0485	100		0.39		16.7961		100	-9.69128
	Structure7	-38	-100	-0.39		9.63219	74.9515	100		64.2147			1.17	3.9									13.29		37.9961	38	25.0485	100		0.39		16.7961		100	-9.63219
	Structure8	-38	-100	-0.39		9.63219	74.9515	100		64.2147			1.17	3.9										13.29	37.9961	38	25.0485	100		0.39		16.7961		100	-9.63219
	Structure9	-38	-100	-0.39		9.57084	74.9515	100		63.8056	0.764706	7.64706											9.42052	0.210294	37.9923	38	25.0485	100		0.39		16.7961		100	-9.57084
	Structure10	-38	-100	-0.39		9.57084	74.9515	100		63.8056	0.764706	7.64706												9.63083	37.9923	38	25.0485	100		0.39		16.7961		100	-9.57084
	Structure11	-38	-100	-0.39		9.51578	74.9515	100		63.4385															38	38	25.0485	100	0.39	0.39				100	-9.51578
	Structure12	-38	-100	-0.39		9.48886	74.9515	100		63.259											0.210526	0.526316	16.6464	0.0486842	38	38	25.0485	100		0.39		16.7961		100	-9.48886
	Structure13	-38	-100	-0.39		9.48228	74.9515	100		63.2151									0.166636	0.416591		0.154139	16.6613	0.0444607	38	38	25.0485	100		0.39		16.7961		100	-9.48228
	Structure14	-38	-100	-0.39		9.47111	74.9515	100		63.1408								0.230502		0.265077		0.194313	16.6717	0.037192	38	38	25.0485	100		0.39		16.7961		100	-9.47111
	Structure15	-38	-100	-0.39		9.45728	74.9515	100		63.0485															38	38	25.0485	100		0.39				100	-9.45728
	Structure16	-38	-100	-0.39		8.27792	100	100		55.1861															38	38		100	0.39	0.39	16.7961	16.7961		100	-8.27792
	Structure17	-38	-100	-0.39		8.22327	100	100		54.8218											0.210526	0.526316	0.0350878	0.0486842	38	38		100		0.39	16.6113	16.7961		100	-8.22327
	Structure18	-38	-100	-0.39		8.22055	100	100		54.8037									0.166636	0.416591		0.154139	0.0241622	0.0444607	38	38		100		0.39	16.6371	16.7961		100	-8.22055
	Structure19	-38	-100	-0.39		8.21942	100	100		54.7961															38	38		100		0.39	16.7961	16.7961		100	-8.21942
	Structure20	-38	-100	-0.39		6.3352	74.9515	100		42.2347																38	25.0485	100	0.39	0.39	16.7961	16.7961		100	-6.3352
	Structure21	-38	-100	-0.39		6.28055	74.9515	100		41.8704											0.210526	0.526316	0.0350878	0.0486842		38	25.0485	100		0.39	16.6113	16.7961		100	-6.28055
	Structure22	-38	-100	-0.39		6.27783	74.9515	100		41.8522									0.166636	0.416591		0.154139	0.0241622	0.0444607		38	25.0485	100		0.39	16.6371	16.7961		100	-6.27783
	Structure23	-38	-100	-0.39		6.2767	74.9515	100		41.8447																38	25.0485	100		0.39	16.7961	16.7961		100	-6.2767
	Structure24	-38	-100	-0.39		5.934	100	100		39.56					1.56	7.8							9.38612		38	38		100		0.39		16.7961		100	-5.934
	Structure25	-38	-100	-0.39		5.934	100	100		39.56					1.56	7.8								9.38612	38	38		100		0.39		16.7961		100	-5.934
	Structure26	-38	-100	-0.39		5.87491	100	100		39.1661			1.17	3.9									13.29		37.9961	38		100		0.39		16.7961		100	-5.87491
	Structure27	-38	-100	-0.39		5.87491	100	100		39.1661			1.17	3.9										13.29	37.9961	38		100		0.39		16.7961		100	-5.87491
	Structure28	-38	-100	-0.39		5.81356	100	100		38.7571	0.764706	7.64706											9.42052	0.210294	37.9923	38		100		0.39		16.7961		100	-5.81356
	Structure29	-38	-100	-0.39		5.81356	100	100		38.7571	0.764706	7.64706												9.63083	37.9923	38		100		0.39		16.7961		100	-5.81356
	Structure30	-38	-100	-0.39		5.7585	100	100		38.39															38	38		100	0.39	0.39				100	-5.7585
	Structure31	-38	-100	-0.39		5.73158	100	100		38.2105											0.210526	0.526316	16.6464	0.0486842	38	38		100		0.39		16.7961		100	-5.73158
	Structure32	-38	-100	-0.39		5.725	100	100		38.1666									0.166636	0.416591		0.154139	16.6613	0.0444607	38	38		100		0.39		16.7961		100	-5.725
	Structure33	-38	-100	-0.39		5.71383	100	100		38.0922							0.0922006	0.230502		0.265077		0.194313	16.6717	0.037192	38	38		100		0.39		16.7961		100	-5.71383
	Structure34	-38	-100	-0.39		5.7	100	100		38															38	38		100		0.39				100	-5.7
	Structure35	-38	-100	-0.39		3.99128	74.9515	100		26.6085					1.56	7.8							9.38612			38	25.0485	100		0.39		16.7961		100	-3.99128
	Structure36	-38	-100	-0.39		3.99128	74.9515	100		26.6085					1.56	7.8								9.38612		38	25.0485	100		0.39		16.7961		100	-3.99128
	Structure37	-38	-100	-0.39		3.93279	74.9515	100		26.2185			1.17	3.9									13.29			38	25.0485	100		0.39		16.7961		100	-3.93279
	Structure38	-38	-100	-0.39		3.93279	74.9515	100		26.2185			1.17	3.9										13.29		38	25.0485	100		0.39		16.7961		100	-3.93279
	Structure39	-38	-100	-0.39		3.87199	74.9515	100		25.8132	0.764706	7.64706											9.42052	0.210294		38	25.0485	100		0.39		16.7961		100	-3.87199
	Structure40	-38	-100	-0.39		3.87199	74.9515	100		25.8132	0.764706	7.64706												9.63083		38	25.0485	100		0.39		16.7961		100	-3.87199
	Structure41	-38	-100	-0.39		3.81579	74.9515	100		25.4385																38	25.0485	100	0.39	0.39				100	-3.81579
	Structure42	-38	-100	-0.39		3.78886	74.9515	100		25.259											0.210526	0.526316	16.6464	0.0486842		38	25.0485	100		0.39		16.7961		100	-3.78886
	Structure43	-38	-100	-0.39		3.78228	74.9515	100		25.2151									0.166636	0.416591		0.154139	16.6613	0.0444607		38	25.0485	100		0.39		16.7961		100	-3.78228
	Structure44	-38	-100	-0.39		3.77111	74.9515	100		25.1408							0.0922006	0.230502		0.265077		0.194313	16.6717	0.037192		38	25.0485	100		0.39		16.7961		100	-3.77111
	Structure45	-38	-100	-0.39		3.75728	74.9515	100		25.0485																38	25.0485	100		0.39				100	-3.75728
	Structure46	-38	-100	-0.39	-4.76583	2.57791	100	100		17.1861																38		100	0.39	0.39	16.7961	16.7961	4.76583	100	-2.57791
	Structure47	-38	-100	-0.39	-4.79356	2.52327	100	100		16.8218											0.210526	0.526316	0.0350878	0.0486842		38		100		0.39	16.6113	16.7961	4.79356	100	-2.52327
	Structure48	-38	-100	-0.39	-4.7915	2.52055	100	100		16.8037									0.166636	0.416591		0.154139	0.0241622	0.0444607		38		100		0.39	16.6371	16.7961	4.7915	100	-2.52055
	Structure49	-38	-100	-0.39	-5.03883	2.51942	100	100		16.7961																38		100		0.39	16.7961	16.7961	5.03883	100	-2.51942
	Structure50	-38	-100	-0.39	-11.4869	0.234	100	100		1.56					1.56	7.8							9.38612			38		100		0.39		16.7961	11.4869	100	-0.234
	Structure51	-38	-100	-0.39	-11.4869	0.234	100	100		1.56					1.56	7.8								9.38612		38		100		0.39		16.7961	11.4869	100	-0.234
	Structure52	-38	-100	-0.39	-12.1491	0.1755	100	100		1.17			1.17	3.9									13.29			38		100		0.39		16.7961	12.1491	100	-0.1755
	Structure53	-38	-100	-0.39	-12.1491	0.1755	100	100		1.17			1.17	3.9									0	13.29		38		100		0.39		16.7961	12.1491	100	-0.1755
	Structure54	-38	-100	-0.39	-12.8052	0.114706	100	100		0.764706	0.764706	7.64706											0	9.63083		38		100		0.39		16.7961	12.8052	100	-0.114706
	Structure55	-38	-100	-0.39	-12.8052	0.114706	100	100		0.764706	0.764706	7.64706											9.42052	0.210294		38		100		0.39		16.7961	12.8052	100	-0.114706
	Structure56	-38	-100	-0.39		0.0585	100	100		0.39																38		100	0.39	0.39				100	-0.0585
	Structure57	-38	-100	-0.39	-13.0992	0.0315789	100	100		0.210526											0.210526	0.526316	16.6464	0.0486842		38		100		0.39		16.7961	13.0992	100	-0.0315789
	Structure58	-38	-100	-0.39	-13.11	0.0249954	100	100		0.166636									0.166636	0.416591		0.154139	16.6613	0.0444607		38		100		0.39		16.7961	13.11	100	-0.0249954
	Structure59	-38	-100	-0.39	-13.1139	0.0138301	100	100		0.0922006							0.0922006	0.230502		0.265077		0.194313	16.6717	0.037192		38		100		0.39		16.7961	13.1139	100	-0.0138301
	Structure60	-38	-100	-0.39			100	100		s																38		100		0.39				100	0
